# Supplementary material for: Investigation of interfacial charge-carrier dynamics, degradation, and recombination mechanisms in single-junction perovskite solar cells with NiO x and SAM hole-transporting layers via steady-state drift-diffusion model simulations
Source: Royal Society of Chemistry journal article supplement (doi:10.1039/d5se00474h), 2026-01-01
Supplement: d5se00474h1.pdf [file d5se00474h1.pdf]

# Supplementary Information: Investigation of interfacial charge-carrier dynamics, degradation, and recombination mechanisms in single-junction perovskite solar cells with $\text{NiO}_x$ and SAM hole-transporting layers via steady-state drift-diffusion model simulations

December 30, 2025

Ivona Kafedjiska<sup>\*,1,4</sup>, Vincent Le Corre<sup>2</sup>, Hans Kobler<sup>3,4</sup>, Igal Levine<sup>4</sup>, Rutger Schlatmann<sup>1,4,5</sup> and Iver Lauermann<sup>1,4</sup>

<sup>1</sup> Helmholtz-Zentrum Berlin für Materialien und Energie GmbH, Competence Centre for Photovoltaics (PVcomB), Schwarzschildstraße 3, 12489 Berlin

<sup>2</sup> Mads Clausen Institute, Center for Advanced Photovoltaics and Thin Film Energy Devices (SDU CAPE), University of Southern Denmark, 6400 Sonderborg, Denmark

<sup>3</sup> Helmholtz-Zentrum Berlin für Materialien und Energie, Department Active Materials and Interfaces for Stable Perovskite Solar Cells, Albert-Einstein-Straße 16, 12489 Berlin

<sup>4</sup> Helmholtz-Zentrum Berlin für Materialien und Energie GmbH, Division Solar Energy, Kekuléstraße 5, 12489 Berlin, Germany

<sup>5</sup> Faculty 1 - Energy and Information, Hochschule für Technik und Wirtschaft Berlin, Germany;

\*Corresponding author: ivona.kafedjiska@helmholtz-berlin.de

# 1 Choice of parameters for the simulations

All of the input parameters are listed below. The input parameters obtained from literature are color coded with orange, and those obtained via experimental measurements are color coded with green. The input parameters are generally separated into seven categories: 1) general (includes temperature; thickness of the simulated stack; VBM, CBM, and  $N_c$  of the perovskite); 2) electron and hole mobilities in the perovskite; 3) contacts (their work functions and surface recombination of the electrons and holes at the electrodes); 4) transport layers (thickness, density of states, doping, interface transfer velocity, VBM, and CBM); 5) Ions; 6) generation rates of electron-hole pairs; and 7) trapping (bulk and surface traps, and if needed, grain boundaries). The effect of the grain boundaries was disabled (set to 0).

Notice that most of the parameters were not altered as the cells were aged, except for the generation rate, the trap densities (bulk and interface) and up to an extent, the mobilities (mostly for fine-tuning of the  $FF$  and only for the samples with  $\text{NiO}_x(+\text{SAM})$ ).

| HTL Type                            | NiOx                            |         | NiOx:Cu |         | NiOx + SAM |         | NiOx:Cu + SAM |         |                                                                              |
|-------------------------------------|---------------------------------|---------|---------|---------|------------|---------|---------------|---------|------------------------------------------------------------------------------|
| With respect to the aging procedure | Before                          | After   | Before  | After   | Before     | After   | Before        | After   | Obtained From                                                                |
| T [K]                               | 295                             |         |         |         |            |         |               |         | External Condition                                                           |
| L [m]                               | 643e-9                          |         |         |         |            |         |               |         | Experimental (thickness is controlled during deposition)                     |
| $\epsilon_r$                        | 22                              |         |         |         |            |         |               |         | Literature                                                                   |
| CB_pero [eV]                        | 4.47                            |         | 3.87    |         | 4.27       |         | 4.17          |         | Experimentally measured (UPS)                                                |
| VB_pero [eV]                        | 6.1                             |         | 5.5     |         | 5.9        |         | 5.8           |         |                                                                              |
| Nc [m^-3]                           | 6.5e23                          |         |         |         |            |         |               |         | Literature                                                                   |
| n_0 [m^-3]                          | 0                               |         |         |         |            |         |               |         | n.a.                                                                         |
| p_0 [m^-3]                          |                                 |         |         |         |            |         |               |         |                                                                              |
| mun_0 [m^2/Vs]                      | 17e-5                           | 1.1E-04 | 1.0E-04 | 1.0E-04 | 1.7E-04    | 1.1E-04 | 1.3E-04       | 1.3E-04 | Literature & then slightly fine tuned                                        |
| mup_0 [m^2/Vs]                      | 17e-5                           | 1.1E-04 | 1.0E-04 | 1.0E-04 | 1.7E-04    | 1.1E-04 | 1.3E-04       | 1.3E-04 |                                                                              |
| mob_n_dep                           | 0 (constant, field-independent) |         |         |         |            |         |               |         | n.a.                                                                         |
| mob_p_dep                           |                                 |         |         |         |            |         |               |         |                                                                              |
| gamma_n                             |                                 |         |         |         |            |         |               |         |                                                                              |
| gamma_p                             |                                 |         |         |         |            |         |               |         |                                                                              |
| W_Left Electrode [eV]               | 4.52                            |         | 4.05    |         | 4.43       |         | 4.32          |         | Literature, and then adjusted in agreement with the shifts in the perovskite |
| W_Right Electrode [eV]              | 5.52                            |         | 5.4     |         | 5.76       |         | 5.73          |         |                                                                              |
| Sn_L [m/s]                          | Turned off                      |         |         |         |            |         |               |         | n.a.                                                                         |
| Sp_L [m/s]                          |                                 |         |         |         |            |         |               |         |                                                                              |
| Sn_R [m/s]                          |                                 |         |         |         |            |         |               |         |                                                                              |
| Sp_R [m/s]                          |                                 |         |         |         |            |         |               |         |                                                                              |
| L_C60 [m]                           | 23e-9                           |         |         |         |            |         |               |         | Experimental (thickness is controlled during deposition)                     |
| L_HTL (NiO or NiO:Cu) [m]           | 20e-9                           |         |         |         |            |         |               |         |                                                                              |
| Nc_C60 [m^-3]                       | 1e26                            |         |         |         |            |         |               |         | Literature                                                                   |
| Nc_HTL [m^-3]                       | 1e24                            |         |         |         |            |         |               |         |                                                                              |
| doping_C60 [m^-3]                   | 0.0E+00                         |         |         |         |            |         |               |         | n.a.                                                                         |
| doping_HTL [m^-3]                   | 2e23                            |         | 1.0E+22 |         | 2e23       |         | 1e22          |         | Experimental (Hall)                                                          |
| mob_C60 [m^2/Vs]                    | 1e-6                            |         |         |         |            |         |               |         | Literature                                                                   |
| mob_HTL [m^2/Vs]                    | 7e-6                            |         |         |         |            |         |               |         |                                                                              |
| nu_int_C60 [m/s]                    | 1.0E+03                         |         |         |         |            |         |               |         |                                                                              |

|                                   |                                                                       |          |          |          |          |          |          |          |                                                                                                                                       |
|-----------------------------------|-----------------------------------------------------------------------|----------|----------|----------|----------|----------|----------|----------|---------------------------------------------------------------------------------------------------------------------------------------|
| nu_int_HTL [m/s]                  | 1.0E+03                                                               |          |          |          |          |          |          |          | Literature                                                                                                                            |
| $\epsilon_r$ _C60                 | 5                                                                     |          |          |          |          |          |          |          |                                                                                                                                       |
| $\epsilon_r$ _HTL                 | 10                                                                    |          |          |          |          |          |          |          |                                                                                                                                       |
| CB_C60 [eV]                       | 4.36                                                                  |          | 4.045    |          | 4.415    |          | 4.3      |          | Literature as starting point, and then adjusted accordingly due to the shifts caused by the HTLs in the perovskite (and then the ETL) |
| CB_HTL [eV]                       | 2.14                                                                  |          | 1.85     |          | 2.28     |          | 2.17     |          | Experimental                                                                                                                          |
| VB_C60 [eV]                       | 6.36                                                                  |          | 6.045    |          | 6.415    |          | 6.3      |          | +2 eV from CB                                                                                                                         |
| VB_HTL [eV]                       | 5.74                                                                  |          | 5.45     |          | 5.78     |          | 5.77     |          | +3.6 eV from CB                                                                                                                       |
| TLsAbsorb                         | 0.0E+00                                                               |          |          |          |          |          |          |          | Literature                                                                                                                            |
| TLsTrap                           |                                                                       |          |          |          |          |          |          |          |                                                                                                                                       |
| IonsInTLs                         |                                                                       |          |          |          |          |          |          |          |                                                                                                                                       |
| CNI [m^-3]                        | 5e21                                                                  |          | 2.5e21   |          | 1.0E+21  |          | 1.0E+21  |          |                                                                                                                                       |
| CPI [m^-3]                        |                                                                       |          |          |          |          |          |          |          |                                                                                                                                       |
| mob_ion_spec                      | 0, meaning that both positive and negative ions can be mobile species |          |          |          |          |          |          |          |                                                                                                                                       |
| ion_red_rate                      | 1                                                                     |          |          |          |          |          |          |          |                                                                                                                                       |
| Gehp                              | 2.28E+27                                                              | 2.29E+27 | 2.18E+27 | 2.16E+27 | 2.36E+27 | 2.24E+27 | 2.34E+27 | 2.21E+27 | Experimental                                                                                                                          |
| Gfrac                             | 1                                                                     |          |          |          |          |          |          |          | Literature                                                                                                                            |
| Gen_profile                       | none                                                                  |          |          |          |          |          |          |          |                                                                                                                                       |
| Field_dep_G                       | 0 (field-independent)                                                 |          |          |          |          |          |          |          |                                                                                                                                       |
| P0                                |                                                                       |          |          |          |          |          |          |          |                                                                                                                                       |
| Charge Sep. Distance [m]          |                                                                       |          |          |          |          |          |          |          |                                                                                                                                       |
| ThermLengDist                     | 2, meaning that the distribution is Gaussian                          |          |          |          |          |          |          |          |                                                                                                                                       |
| Decay Rate [1/s]                  | 1e6                                                                   |          |          |          |          |          |          |          |                                                                                                                                       |
| kdirect [m^3/s]                   | 1e-17                                                                 |          |          |          |          |          |          |          |                                                                                                                                       |
| Lang_pre                          | 1                                                                     |          |          |          |          |          |          |          |                                                                                                                                       |
| UseLangevin                       | 0                                                                     |          |          |          |          |          |          |          |                                                                                                                                       |
| Bulk Trap Density [m^-3]          | 9.0E+19                                                               | 3.2E+21  | 1.1E+20  | 3.0E+20  | 3.0E+20  | 3.0E+20  | 1.1E+20  | 9.0E+20  | Experimental                                                                                                                          |
| Interface Trap Density_C60 [m^-2] | 5.0E+14                                                               |          |          |          |          |          |          |          | Literature                                                                                                                            |
| Interface Trap Density_HTL [m^-2] | 4.0E+13                                                               | 1.2E+13  | 7.0E+13  | 6.5E+13  | 3.0E+13  | 2.0E+13  | 8.0E+13  | 1.2E+14  | Experimental, but reported already in [3]                                                                                             |
| num_GB                            | 0                                                                     |          |          |          |          |          |          |          |                                                                                                                                       |
| GB_TrapDenisty [m^-2]             | 1e15                                                                  |          | 1e13     |          |          |          | 7e13     |          | Literature. Slight fine-tuning for some of the parameters to improve the fit, if needed                                               |
| Cn [m^3/s]                        | 1e-14                                                                 |          |          |          |          |          |          |          |                                                                                                                                       |
| Cp [m^3/s]                        |                                                                       |          |          |          |          |          |          |          |                                                                                                                                       |
| Etrap [eV]                        | 5.3                                                                   |          | 4.7      |          | 5.0      |          |          |          |                                                                                                                                       |
| BulkTrapFile                      | none                                                                  |          |          |          |          |          |          |          |                                                                                                                                       |
| IntTrapFile                       |                                                                       |          |          |          |          |          |          |          |                                                                                                                                       |
| Trap_type_C60                     |                                                                       |          |          |          |          |          |          |          |                                                                                                                                       |
| Trap_type_HTL                     | 0 (neutral)                                                           |          |          |          |          |          |          |          |                                                                                                                                       |
| Trap_type_Bulk-and-GB             | 1 (donor)                                                             |          |          |          |          |          |          |          |                                                                                                                                       |

**Figure 1:** All of the input parameters used in the simulations. The literature values were retrieved from [1–6].

Elaboration on how the values for  $C_{60}$  are adjusted: The electronic changes caused by the HTL continue to impact the rest of the device and they do not end at the HTL or the perovskite bulk. Thus, while the VBM and the CBM of the  $C_{60}$  are not per se calculated or measured, they are fine tuned in line with the values for the VBM and CBM of the HTL + perovskite configuration. As a starting point, for the VBM of the  $C_{60}$  we use 6.0 eV, in line with literature.

The VBM of the perovskite with  $\text{NiO}_x\text{:Cu}$  was measured to be 5.5 eV and the VBM of the perovskite with  $\text{NiO}_x\text{:Cu}$  and  $\text{NiO}_x + \text{SAM}$  were measured to be 5.8 and 5.9 eV, respectively. So, the difference / shift in the band alignment with moving from  $\text{NiO}_x\text{:Cu}$  to  $\text{NiO}_x\text{:Cu} + \text{SAM}$  and  $\text{NiO}_x + \text{SAM}$  is 0.3 and 0.4 eV, respectively.

Then, we set the VBM of  $C_{60}$  at 6.0 eV for all of these three cells as a starting point. The best fit was obtained for the cells with  $\text{NiO}_x\text{:Cu}$  (slightly fine tuned to 6.04 eV). Then the VBM of the  $C_{60}$  for the cells with  $\text{NiO}_x\text{:Cu} + \text{SAM}$  and  $\text{NiO}_x + \text{SAM}$  was raised by 0.3 and 0.4 eV, respectively -

up to 6.3 eV ( $\text{NiO}_x\text{:Cu} + \text{SAM}$ ) and 6.41 eV ( $\text{NiO}_x + \text{SAM}$ ) - both of which led to a good fit. The CBM is calculated by using a  $E_g$  of 2 eV.

The cells with  $\text{NiO}_x$  were an exception to this logic though. As the VBM of the perovskite with  $\text{NiO}_x$  (6.1 eV) is 0.6 eV higher than the VBM of the perovskite with  $\text{NiO}_x\text{:Cu}$  (5.5 eV), one would expect a 0.6 eV shift in the VBM of the  $\text{C}_{60}$  as well (6.6 eV). However, this did not lead to a good fit of the JV curve, so the VBM was gradually decreased, until the value converged at 6.36 eV. This indicates that the sub-optimal band alignment at the  $\text{NiO}_x$ -perovskite interface, affects the band alignment at the ETL-perovskite interface as well.

The doping and the mobility in the HTL were obtained from Hall measurements for  $\text{NiO}_x\text{:Cu}$  and it was assumed that passivating the  $\text{NiO}_x\text{:Cu}$  surface with SAM does not change the doping in the bulk of the  $\text{NiO}_x\text{:Cu}$  (*Figure 2*).

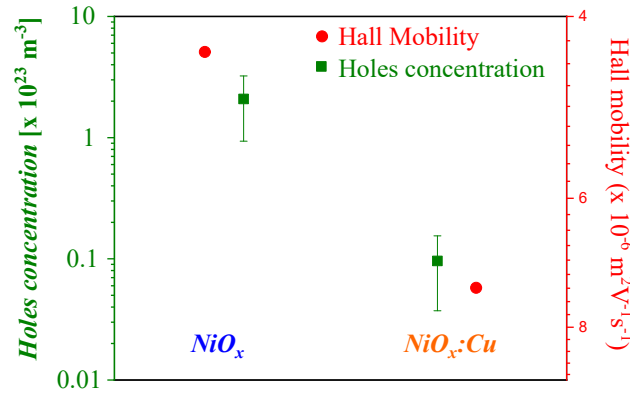

**Figure 2:** Hall measurements for the concentration of holes in  $\text{NiO}_x$  and  $\text{NiO}_x\text{:Cu}$ . The extracted values for the simulations are written in Table 1 above.

## 2 JV Curves: Aging Experiments and Varying Scan Speeds

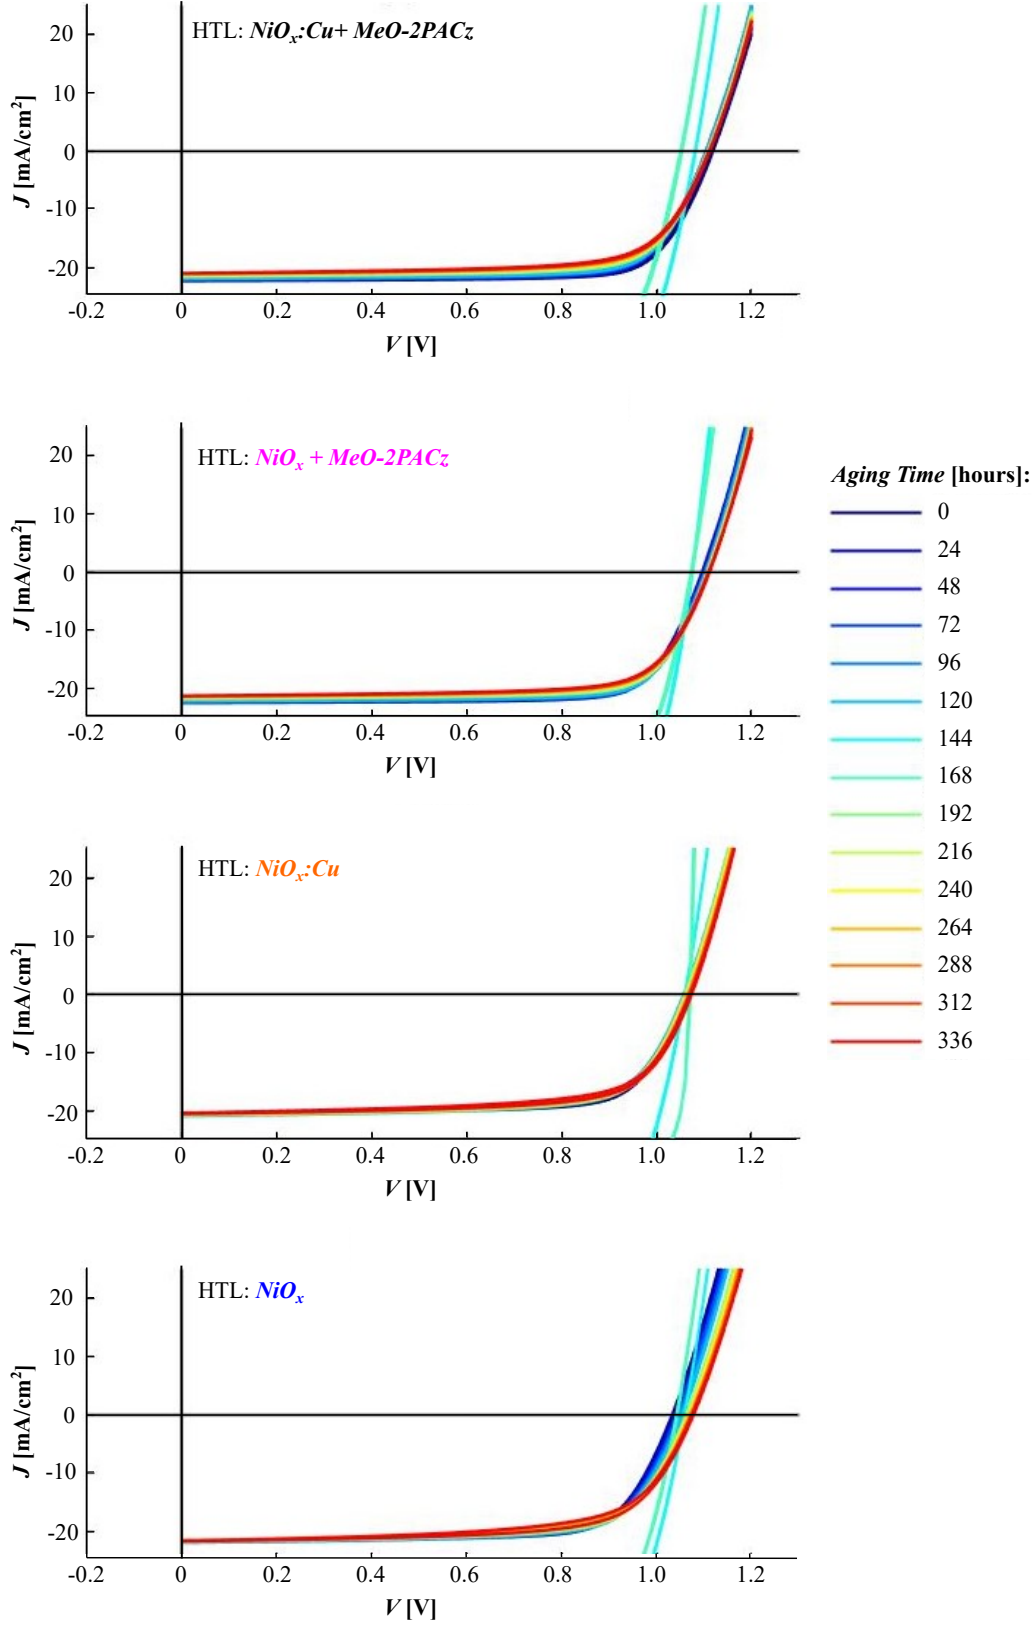

**Figure 3:** The JV curves of the champion devices per HTL with respect to stability. The simulated JV curves in Figure 1 in the paper are taken at aging times of 0 hours (fresh) and at 336 hours (14-days aged cells). The electrical contact to the cells was lost on the seventh and eighth day (144 and 168 hours), causing an artifact in the JV curves. The measurements continued upon fixing this issue.

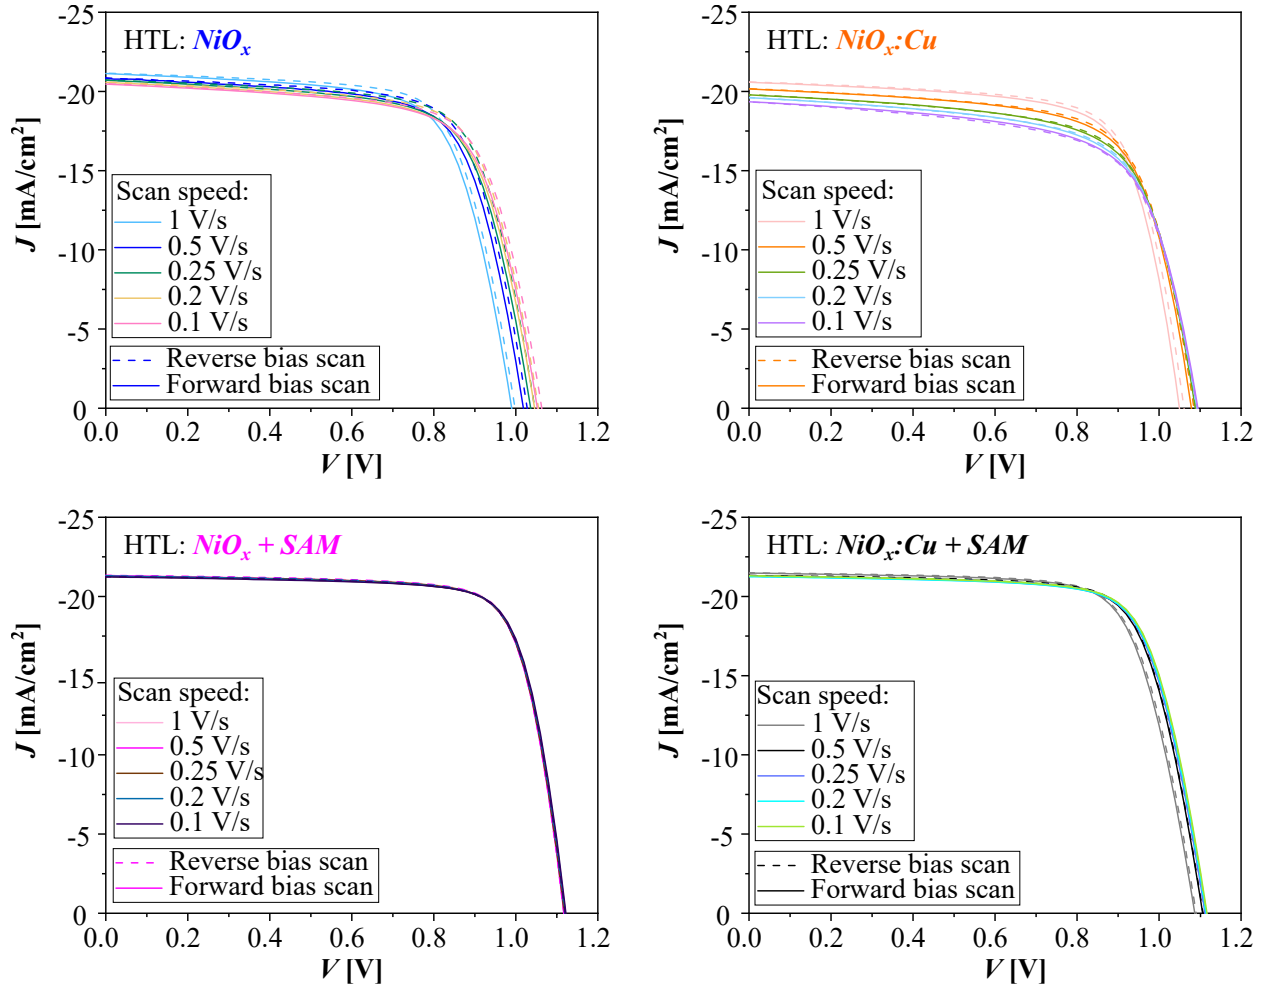

**Figure 4:** One averaged JV curve per scan rate from the six pixels on a given sample for each HTL:  $\text{NiO}_x$ ,  $\text{NiO}_x:\text{Cu}$ ,  $\text{NiO}_x + \text{SAM}$ ,  $\text{NiO}_x:\text{Cu} + \text{SAM}$ . The hysteresis factors presented in Figure 7 in the paper were obtained from these JV curves.

### 3 Traps' densities and rates of recombination

|                                                                    | <b>NiO<sub>x</sub></b> |        | <b>NiO<sub>x</sub>:Cu</b> |      | <b>NiO<sub>x</sub> + SAM</b> |                       | <b>NiO<sub>x</sub>:Cu + SAM</b> |      |
|--------------------------------------------------------------------|------------------------|--------|---------------------------|------|------------------------------|-----------------------|---------------------------------|------|
|                                                                    | Fresh                  | Aged   | Fresh                     | Aged | Fresh                        | Aged                  | Fresh                           | Aged |
| <b>Traps<sub>HTL-pero</sub></b><br>$\times 10^{13} \text{ m}^{-2}$ | 4.0                    | 1.2    | 7.0                       | 6.5  | 3.0                          | 2.0                   | 8.0                             | 12.0 |
| <b>Traps<sub>Bulk</sub></b><br>$\times 10^{20} \text{ m}^{-3}$     | 0.9                    | 32.1   | 1.1                       | 3.0  | 3.0                          | 3.0                   | 1.1                             | 9.0  |
| <b>R<sub>dir</sub></b><br>$\times 10^{23} \text{ m}^{-3}/s$        | 0.07                   | 0.19   | 6.99                      | 6.84 | 3.46                         | 0.08                  | 7.83                            | 3.37 |
| <b>R<sub>Bulk-SRH</sub></b><br>$\times 10^{25} \text{ m}^{-3}/s$   | 0.01                   | 0.03   | 3.17                      | 8.46 | 9.21                         | 0.06                  | 2.34                            | 5.23 |
| <b>R<sub>Int-SRH-n</sub></b><br>$\times 10^{28} \text{ m}^{-3}/s$  | 198.25                 | 206.54 | 3.18                      | 2.89 | 1.48                         | 130.17                | 1.46                            | 1.09 |
| <b>R<sub>Int-SRH-p</sub></b><br>$\times 10^{28} \text{ m}^{-3}/s$  | 0.002                  | 0.001  | 0.26                      | 0.24 | 0.01                         | $0.01 \times 10^{-2}$ | 0.24                            | 0.18 |

**Table 1:** Holes trap density at the HTL-perovskite interface ( $\text{Traps}_{\text{HTL-pero}}$ ) and in the perovskite bulk ( $\text{Traps}_{\text{Bulk}}$ ) followed by varying rates of recombination at  $V_{oc}$  for fresh and aged single-junction perovskite solar cells with  $\text{NiO}_x(\text{:Cu})(+\text{SAM})$  HTLs and  $\text{C}_{60}\text{-SnO}_2$  as an ETL stack.  $R_{dir}$ : direct recombination;  $R_{\text{Bulk-SRH}}$ : recombination via bulk traps;  $R_{\text{Int-SRH-n}}$  or  $R_{\text{Int-SRH-p}}$ : recombination via interface traps, where  $n$  and  $p$  distinguish between trapping of electrons and holes, respectively.

### 4 UPS Measurements

The work function (WF, see *Figure 6a*) is determined via

$$WF = h\nu - E_{SEE} - E_F, \quad (1)$$

where  $h\nu$  is the excitation energy (21.2 eV),  $E_{SEE}$  is the binding-energy point where the linear extrapolation of the secondary electron edge (SEE) intercepts the background, and  $E_F$  is the shift away from 0 eV of the Fermi level of a clean gold (Au) sample contacted to both the sample and the manipulator in the analytic chamber. This calibration gives us 1.19 eV shift for the Fermi level of the gold (*Figure 6b*).

The VBM is determined by a linear extrapolation of the leading edge of the UPS spectrum until the line intercepts the pre-determined background. The error ascribed to the UPS measurements is obtained by averaging the two most extreme linear fits for the dominant linear slope and reported as the deviation between the minimum and the maximum value from this average value.

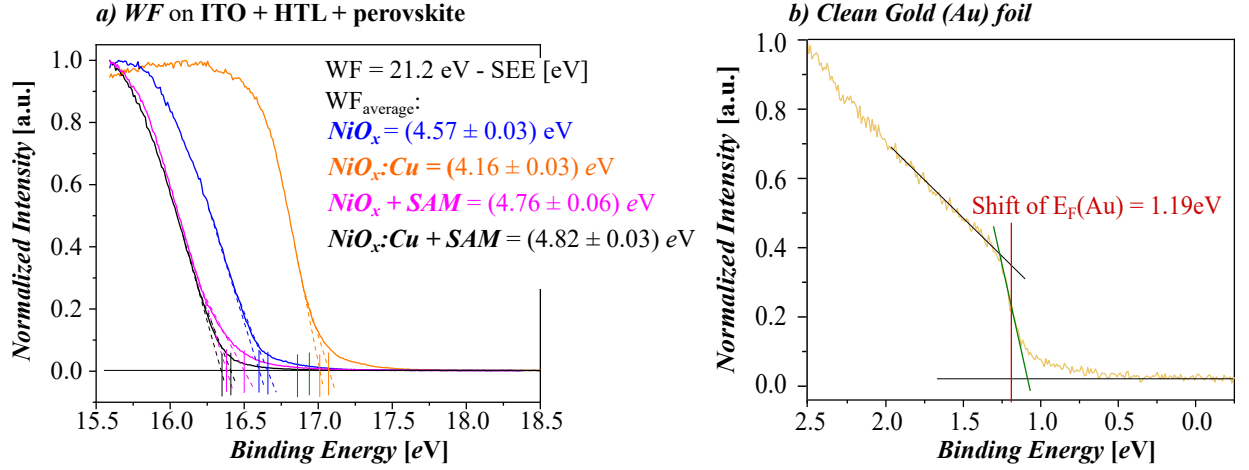

**Figure 5:** a) Work function (WF) of the triple-cation perovskite films deposited and then measured on top of an ITO + HTL + perovskite partial-cell stack. The extracted value is the average of the two values denoted on the plot. The HTLs are  $\text{NiO}_x$  (blue),  $\text{NiO}_x:\text{Cu}$  (orange),  $\text{NiO}_x + \text{SAM}$  (magenta), and  $\text{NiO}_x:\text{Cu} + \text{SAM}$  (black). The SAM is MeO-2PACz. b) Calibration with a clean gold sample to find its Fermi-level shift.

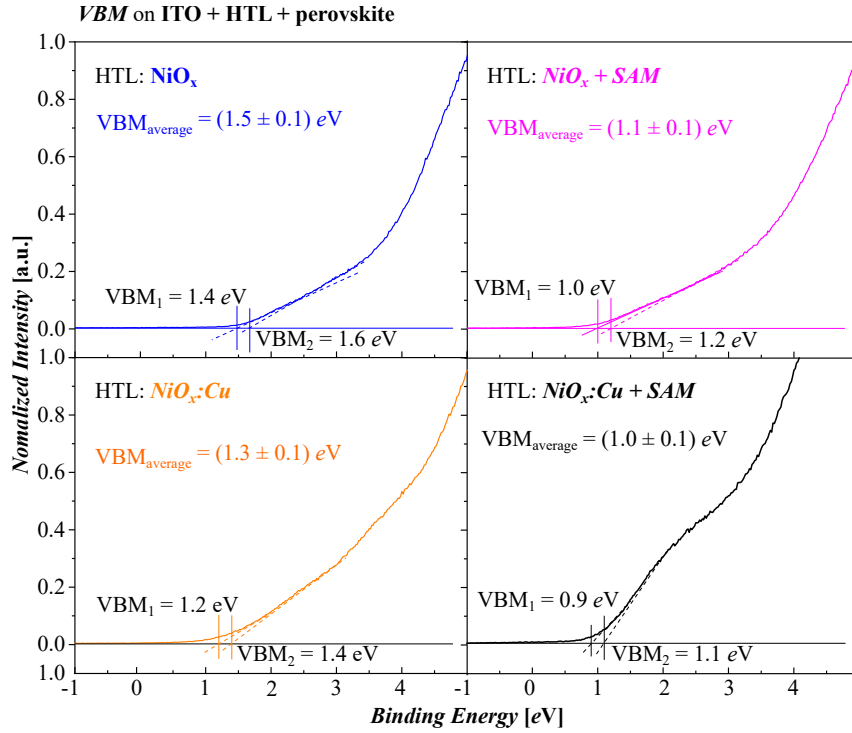

**Figure 6:** Valence band maxima (VBM) of the triple-cation perovskite films deposited and then measured on top of an ITO + HTL + perovskite partial-cell stack. The HTLs are  $\text{NiO}_x$  (blue),  $\text{NiO}_x:\text{Cu}$  (orange),  $\text{NiO}_x + \text{SAM}$  (magenta), and  $\text{NiO}_x:\text{Cu} + \text{SAM}$  (black). The SAM is MeO-2PACz.



## References

- [1] Vincent M. Le Corre et al. “Device Modeling of Perovskite Solar Cells: Insights and Outlooks”. In: *Soft-Matter Thin Film Solar Cells*. AIP Publishing Books. AIP Publishing LLC, Sept. 2020, pp. 4–1–4–32. DOI: 10.1063/9780735422414\_004.
- [2] Pietro Caprioglio et al. “On the Relation between the Open-Circuit Voltage and Quasi-Fermi Level Splitting in Efficient Perovskite Solar Cells”. In: *Adv. Energy Mater.* 9.33 (Sept. 2019), p. 1901631. DOI: 10.1002/aenm.201901631.
- [3] Ivona Kafedjiska et al. “Advanced Characterization and Optimization of NiOx: Cu-SAM Hole-Transporting Bi-Layer for 23.4% Efficient Monolithic Cu (In, Ga) Se<sub>2</sub>-Perovskite Tandem Solar Cells”. In: *Advanced Functional Materials* (), p. 2302924.
- [4] Vincent M. Le Corre et al. “Quantification of Efficiency Losses Due to Mobile Ions in Perovskite Solar Cells via Fast Hysteresis Measurements”. In: *Solar RRL* 6.4 (2022), p. 2100772. DOI: 10.1002/solr.202100772.
- [5] Marten Koopmans and L Jan Anton Koster. “Voltage deficit in wide bandgap perovskite solar cells: the role of traps, band energies, and effective density of states”. In: *Solar RRL* 6.12 (2022), p. 2200560.
- [6] Albert These et al. “Beginner’s Guide to Visual Analysis of Perovskite and Organic Solar Cell Current Density–Voltage Characteristics”. In: *Advanced Energy Materials* 14.21 (2024), p. 2400055.
